# Supplementary material for: Interplay of coordinative and supramolecular interactions in engineering unusual crystalline architectures of low-dimensional metal–pamoate complexes under co-ligand intervention
Source: Royal Society of Chemistry journal article supplement (doi:10.1039/b707853f), 2007-01-01
Supplement: b707853f.pdf [file b707853f.pdf]

*Electronic Supplementary Information (ESI) for B707853F*

**Interplay of coordinative and supramolecular interactions in engineering  
unusual crystalline architectures of low-dimensional metal-pamoate com-  
plexes under co-ligand intervention**

Miao Du,\* Cheng-Peng Li, Xiao-Jun Zhao, and Qian Yu

**Table S1** Hydrogen-bonding metrics for compounds 1–12

| Compound | D–H...A                            | D...A (Å) | H...A (Å) | D–H...A (°) |
|----------|------------------------------------|-----------|-----------|-------------|
| <b>1</b> | O(3)–H(3)...O(2)                   | 2.569(3)  | 1.83      | 149         |
|          | O(4)–H(4)...O(5)                   | 2.588(3)  | 1.86      | 147         |
|          | O(9)–H(9)...O(8)                   | 2.560(3)  | 1.82      | 149         |
|          | O(12)–H(12)...O(11)                | 2.591(3)  | 1.86      | 148         |
|          | O(1)–H(1)...O(13)                  | 2.548(3)  | 1.73      | 172         |
|          | O(6)–H(6)...O(14) <sup>[a]</sup>   | 2.624(3)  | 1.82      | 168         |
|          | O(7)–H(7)...O(16) <sup>[b]</sup>   | 2.515(3)  | 1.71      | 169         |
|          | O(10)–H(10)...O(15) <sup>[c]</sup> | 2.570(3)  | 1.76      | 169         |
| <b>2</b> | O(7)–H(7)...O(8)                   | 2.503(2)  | 1.76      | 150         |
|          | O(10)–H(10)...O(11)                | 2.521(2)  | 1.78      | 149         |
|          | O(3)–H(3A)...O(9) <sup>[a]</sup>   | 2.741(3)  | 1.95      | 155         |
|          | O(3)–H(3B)...O(9)                  | 2.710(3)  | 1.87      | 167         |
|          | O(4)–H(4A)...O(8) <sup>[b]</sup>   | 2.896(2)  | 2.06      | 167         |
|          | O(4)–H(4B)...O(8)                  | 2.782(2)  | 1.98      | 156         |
|          | O(5)–H(5A)...O(12) <sup>[c]</sup>  | 2.763(3)  | 2.03      | 144         |
|          | O(5)–H(5B)...O(12) <sup>[d]</sup>  | 2.668(3)  | 1.82      | 177         |
|          | O(6)–H(6A)...O(11) <sup>[d]</sup>  | 2.690(2)  | 1.84      | 173         |
|          | O(6)–H(6B)...O(7) <sup>[b]</sup>   | 2.841(2)  | 2.01      | 166         |

|           |                                |          |      |     |
|-----------|--------------------------------|----------|------|-----|
| <b>3</b>  | O(1)–H(1)…O(2)                 | 2.555(2) | 1.82 | 148 |
|           | O(6)–H(6)…O(5)                 | 2.550(2) | 1.81 | 149 |
|           | O(9)–H(9A)…O(5) <sup>[a]</sup> | 2.647(2) | 1.81 | 169 |
|           | O(9)–H(9B)…O(2) <sup>[b]</sup> | 2.646(2) | 1.80 | 172 |
| <b>4</b>  | O(3)–H(3A)…O(2)                | 2.540(3) | 1.80 | 149 |
|           | O(4)–H(4A)…O(5)                | 2.533(3) | 1.79 | 149 |
| <b>5</b>  | O(3)–H(3)…O(2)                 | 2.535(3) | 1.79 | 150 |
|           | O(4)–H(4)…O(5)                 | 2.541(3) | 1.80 | 149 |
| <b>6</b>  | O(3)–H(3)…O(2)                 | 2.525(2) | 1.79 | 148 |
|           | O(4)–H(4)…O(5)                 | 2.534(3) | 1.79 | 149 |
| <b>7</b>  | O(3)–H(3)…O(2)                 | 2.501(2) | 1.75 | 151 |
|           | O(4)–H(4A)…O(1)                | 2.713(2) | 1.92 | 155 |
|           | O(4)–H(4B)…O(1) <sup>[a]</sup> | 2.656(2) | 1.83 | 163 |
|           | O(5)–H(5')…O(2)                | 2.851(2) | 2.10 | 144 |
| <b>8</b>  | O(3)–H(3)…O(1)                 | 2.556(5) | 1.82 | 149 |
|           | O(4)–H(4)…O(5)                 | 2.543(5) | 1.80 | 150 |
|           | O(7)–H(7A)…O(1)                | 2.683(5) | 1.85 | 163 |
|           | O(7)–H(7B)…O(8) <sup>[a]</sup> | 2.648(6) | 1.82 | 161 |
| <b>9</b>  | O(3)–H(3)…O(2)                 | 2.528(5) | 1.78 | 150 |
|           | O(4)–H(4)…O(5)                 | 2.561(5) | 1.82 | 149 |
|           | O(7)–H(7A)…O(9) <sup>[a]</sup> | 2.649(6) | 1.81 | 167 |
|           | O(7)–H(7B)…O(5) <sup>[b]</sup> | 2.678(5) | 1.84 | 165 |
| <b>10</b> | O(5)–H(5)…O(4)                 | 2.565(3) | 1.84 | 146 |
|           | O(6)–H(6)…O(1)                 | 2.536(3) | 1.79 | 150 |
| <b>11</b> | O(3)–H(3)…O(2)                 | 2.511(2) | 1.77 | 149 |
| <b>12</b> | O(3)–H(3)…O(2)                 | 2.491(6) | 1.84 | 135 |
|           | O(4)–H(4)…O(5)                 | 2.552(6) | 1.83 | 147 |

---

For **1**: <sup>[a]</sup>  $-x + 2, -y + 1, -z + 1$ ; <sup>[b]</sup>  $-x + 1, y - 1/2, -z + 3/2$ ; <sup>[c]</sup>  $-x, -y + 1, -z + 1$ . For **2**: <sup>[a]</sup>  $-x + 1, -y + 2, -z + 1$ ; <sup>[b]</sup>  $-x, -y + 2, -z + 1$ ; <sup>[c]</sup>  $-x, -y + 1, -z + 1$ ; <sup>[d]</sup>  $x, y + 1, z - 1$ . For **3**: <sup>[a]</sup>  $-x + 1/2, y - 1/2, -z + 3/2$ ; <sup>[b]</sup>  $-x, -y + 1, -z + 1$ . For **7**: <sup>[a]</sup>  $-x + 1, -y + 1, -z + 1$ . For **8**: <sup>[a]</sup>  $-x + 1, -y, -z + 2$ . For **9**: <sup>[a]</sup>  $-x + 1, y + 1/2, -z + 1/2$ ; <sup>[b]</sup>  $x, -y + 5/2, z + 1/2$ .

**Table S2** Selected bond distances (Å) and angles (°) for compounds **1–12**<sup>[a]</sup>

---

| <b>Compound 1</b> |          |                   |          |
|-------------------|----------|-------------------|----------|
| C(1)–O(1)         | 1.309(3) | C(1)–O(2)         | 1.222(3) |
| C(16)–O(5)        | 1.224(3) | C(16)–O(6)        | 1.326(3) |
| C(24)–O(7)        | 1.297(3) | C(24)–O(8)        | 1.231(3) |
| C(45)–O(10)       | 1.312(3) | C(45)–O(11)       | 1.226(3) |
| C(46)–O(12)       | 1.353(3) | C(34)–O(9)        | 1.365(3) |
| C(11)–O(3)        | 1.365(3) | C(14)–O(4)        | 1.357(3) |
| C(10)–C(12)–C(13) | 116.0(2) | C(33)–C(35)–C(36) | 115.5(2) |

| <b>Compound 2</b> |           |                   |          |
|-------------------|-----------|-------------------|----------|
| Mn(1)–O(1)        | 2.135(2)  | Mn(1)–O(2)        | 2.130(2) |
| Mn(1)–O(3)        | 2.175(2)  | Mn(1)–O(4)        | 2.224(2) |
| Mn(1)–O(5)        | 2.133(2)  | Mn(1)–O(6)        | 2.196(2) |
| O(7)–C(17)        | 1.363(2)  | O(10)–C(20)       | 1.351(3) |
| O(8)–C(7)         | 1.271(3)  | O(9)–C(7)         | 1.240(3) |
| O(11)–C(22)       | 1.261(3)  | O(12)–C(22)       | 1.249(3) |
| O(1)–Mn(1)–O(2)   | 100.2(1)  | O(1)–Mn(1)–O(3)   | 91.41(9) |
| O(1)–Mn(1)–O(4)   | 174.39(8) | O(1)–Mn(1)–O(5)   | 88.92(9) |
| O(1)–Mn(1)–O(6)   | 85.33(8)  | O(2)–Mn(1)–O(3)   | 90.71(8) |
| O(2)–Mn(1)–O(4)   | 84.12(8)  | O(2)–Mn(1)–O(5)   | 88.37(8) |
| O(2)–Mn(1)–O(6)   | 172.55(8) | O(3)–Mn(1)–O(4)   | 84.86(7) |
| O(3)–Mn(1)–O(5)   | 179.07(6) | O(3)–Mn(1)–O(6)   | 94.20(7) |
| O(4)–Mn(1)–O(5)   | 94.87(7)  | O(4)–Mn(1)–O(6)   | 90.75(7) |
| O(5)–Mn(1)–O(6)   | 86.69(7)  | C(16)–C(18)–C(19) | 118.7(2) |

| <b>Compound 3</b> |          |             |          |
|-------------------|----------|-------------|----------|
| Cu(1)–O(3)        | 1.956(1) | Cu(1)–O(4A) | 1.959(1) |
| Cu(1)–O(7)        | 2.306(2) | Cu(1)–O(8)  | 1.952(2) |
| Cu(1)–O(9)        | 1.945(1) | O(1)–C(11)  | 1.358(3) |
| O(6)–C(23)        | 1.356(2) | O(2)–C(1)   | 1.256(3) |
| O(3)–C(1)         | 1.266(3) | O(4)–C(22)  | 1.258(3) |
| O(5)–C(22)        | 1.259(3) |             |          |

|                   |           |                  |           |
|-------------------|-----------|------------------|-----------|
| O(3)–Cu(1)–O(4A)  | 176.71(6) | O(3)–Cu(1)–O(7)  | 93.89(6)  |
| O(3)–Cu(1)–O(8)   | 91.38(6)  | O(3)–Cu(1)–O(9)  | 89.42(6)  |
| O(4A)–Cu(1)–O(7)  | 88.94(6)  | O(4A)–Cu(1)–O(8) | 89.97(7)  |
| O(4A)–Cu(1)–O(9)  | 88.88(6)  | O(7)–Cu(1)–O(8)  | 96.30(6)  |
| O(7)–Cu(1)–O(9)   | 90.55(6)  | O(8)–Cu(1)–O(9)  | 173.02(7) |
| C(10)–C(12)–C(13) | 116.1(2)  |                  |           |

#### Compound 4

|                   |           |                   |           |
|-------------------|-----------|-------------------|-----------|
| Cd(1)–O(1)        | 2.557(2)  | Cd(1)–O(2)        | 2.295(2)  |
| Cd(1)–O(5B)       | 2.528(2)  | Cd(1)–O(6B)       | 2.337(2)  |
| C(1)–O(1)         | 1.238(3)  | C(1)–O(2)         | 1.275(4)  |
| C(16)–O(5)        | 1.264(3)  | C(16)–O(6)        | 1.252(3)  |
| C(3)–O(3)         | 1.346(3)  | C(14)–O(4)        | 1.358(3)  |
| O(1)–Cd(1)–O(1A)  | 128.1(1)  | O(1)–Cd(1)–O(2)   | 53.35(7)  |
| O(1)–Cd(1)–O(2A)  | 89.34(7)  | O(1)–Cd(1)–O(5B)  | 135.63(6) |
| O(1)–Cd(1)–O(5C)  | 81.09(7)  | O(1)–Cd(1)–O(6B)  | 83.70(6)  |
| O(1)–Cd(1)–O(6C)  | 128.97(7) | O(2)–Cd(1)–O(2A)  | 91.9(1)   |
| O(2)–Cd(1)–O(5B)  | 170.07(7) | O(2)–Cd(1)–O(5C)  | 84.57(8)  |
| O(2)–Cd(1)–O(6B)  | 136.26(7) | O(2)–Cd(1)–O(6C)  | 95.93(7)  |
| O(5B)–Cd(1)–O(5C) | 100.4(1)  | O(5B)–Cd(1)–O(6B) | 53.52(6)  |
| O(5B)–Cd(1)–O(6C) | 80.49(7)  | O(6B)–Cd(1)–O(6C) | 107.2(1)  |
| C(4)–C(12)–C(13)  | 113.5(2)  |                   |           |

#### Compound 5

|                   |           |                  |           |
|-------------------|-----------|------------------|-----------|
| Zn(1)–O(1)        | 2.000(2)  | Zn(1)–O(7)       | 2.135(3)  |
| Zn(1)–O(6A)       | 1.974(2)  | Zn(1)–N(1)       | 2.127(3)  |
| Zn(1)–N(2)        | 2.147(3)  | O(1)–C(11)       | 1.275(3)  |
| O(2)–C(11)        | 1.242(4)  | O(5)–C(26)       | 1.248(4)  |
| O(6)–C(26)        | 1.274(4)  | O(3)–C(12)       | 1.364(3)  |
| O(4)–C(24)        | 1.370(3)  |                  |           |
| O(1)–Zn(1)–O(6A)  | 101.79(9) | O(1)–Zn(1)–O(7)  | 94.7(1)   |
| O(1)–Zn(1)–N(1)   | 94.8(1)   | O(1)–Zn(1)–N(2)  | 157.8(1)  |
| O(6A)–Zn(1)–O(7)  | 93.9(1)   | O(6A)–Zn(1)–N(1) | 117.67(9) |
| O(6A)–Zn(1)–N(2)  | 100.4(1)  | O(7)–Zn(1)–N(1)  | 144.2(1)  |
| O(7)–Zn(1)–N(2)   | 83.1(1)   | N(1)–Zn(1)–N(2)  | 75.4(1)   |
| C(13)–C(22)–C(23) | 115.1(2)  |                  |           |

### Compound 6

|                  |           |                  |           |
|------------------|-----------|------------------|-----------|
| Cd(1)–O(1)       | 2.436(2)  | Cd(1)–O(2)       | 2.405(2)  |
| Cd(1)–O(6A)      | 2.247(2)  | Cd(1)–O(7)       | 2.305(2)  |
| Cd(1)–N(1)       | 2.332(2)  | Cd(1)–N(2)       | 2.343(2)  |
| O(1)–C(1)        | 1.249(3)  | O(2)–C(1)        | 1.264(3)  |
| O(5)–C(16)       | 1.263(3)  | O(6)–C(16)       | 1.253(3)  |
| O(3)–C(3)        | 1.356(3)  | O(4)–C(14)       | 1.355(3)  |
| O(1)–Cd(1)–O(2)  | 53.65(6)  | O(1)–Cd(1)–O(6A) | 98.50(7)  |
| O(1)–Cd(1)–O(7)  | 80.94(7)  | O(1)–Cd(1)–N(1)  | 135.89(7) |
| O(1)–Cd(1)–N(2)  | 92.28(7)  | O(2)–Cd(1)–O(6A) | 98.46(7)  |
| O(2)–Cd(1)–O(7)  | 133.29(7) | O(2)–Cd(1)–N(1)  | 83.95(7)  |
| O(2)–Cd(1)–N(2)  | 85.66(7)  | O(6A)–Cd(1)–O(7) | 98.50(8)  |
| O(6A)–Cd(1)–N(1) | 99.34(7)  | O(6A)–Cd(1)–N(2) | 168.86(7) |
| O(7)–Cd(1)–N(1)  | 134.96(8) | O(7)–Cd(1)–N(2)  | 85.89(8)  |
| N(1)–Cd(1)–N(2)  | 70.69(7)  | C(4)–C(12)–C(13) | 115.4(2)  |

### Compound 7

|                  |           |                    |           |
|------------------|-----------|--------------------|-----------|
| Mn(1)–O(4)       | 2.139(1)  | Mn(1)–N(1)         | 2.264(2)  |
| Mn(1)–N(2)       | 2.317(2)  | O(3)–C(15)         | 1.362(2)  |
| C(13)–O(1)       | 1.253(2)  | C(13)–O(2)         | 1.261(2)  |
| O(4)–Mn(1)–O(4A) | 80.35(7)  | O(4)–Mn(1)–N(1)    | 91.98(5)  |
| O(4)–Mn(1)–N(1A) | 157.55(5) | O(4)–Mn(1)–N(2)    | 106.48(5) |
| O(4)–Mn(1)–N(2A) | 89.46(6)  | N(1)–Mn(1)–N(1A)   | 102.29(8) |
| N(1)–Mn(1)–N(2)  | 72.41(6)  | N(1)–Mn(1)–N(2A)   | 94.42(6)  |
| N(2)–Mn(1)–N(2A) | 159.32(9) | C(16)–C(17)–C(16B) | 115.9(2)  |

### Compound 8

|                  |          |                  |          |
|------------------|----------|------------------|----------|
| Cu(1)–O(5A)      | 1.971(3) | Cu(1)–O(7)       | 1.980(4) |
| Cu(1)–N(1)       | 2.015(4) | Cu(1)–N(2)       | 2.021(4) |
| Cu(1)–O(2)       | 2.252(3) | O(1)–C(13)       | 1.259(6) |
| O(2)–C(13)       | 1.253(6) | O(5)–C(28)       | 1.313(6) |
| O(6)–C(28)       | 1.224(6) | O(3)–C(15)       | 1.366(6) |
| O(4)–C(26)       | 1.353(5) |                  |          |
| O(2)–Cu(1)–O(5A) | 93.7(1)  | O(2)–Cu(1)–O(7)  | 86.6(1)  |
| O(2)–Cu(1)–N(1)  | 95.4(1)  | O(2)–Cu(1)–N(2)  | 99.1(1)  |
| O(5A)–Cu(1)–O(7) | 94.1(2)  | O(5A)–Cu(1)–N(1) | 92.9(2)  |
| O(5A)–Cu(1)–N(2) | 166.3(2) | O(7)–Cu(1)–N(1)  | 172.6(1) |

|                   |          |                 |         |
|-------------------|----------|-----------------|---------|
| O(7)–Cu(1)–N(2)   | 91.6(2)  | N(1)–Cu(1)–N(2) | 81.1(2) |
| C(16)–C(24)–C(25) | 116.4(4) |                 |         |

### Compound 9

|                  |          |                   |          |
|------------------|----------|-------------------|----------|
| Zn(1)–O(1)       | 2.416(4) | Zn(1)–O(2)        | 2.107(3) |
| Zn(1)–O(6A)      | 2.064(3) | Zn(1)–O(7)        | 2.075(3) |
| Zn(1)–N(1)       | 2.127(4) | Zn(1)–N(2)        | 2.156(4) |
| O(1)–C(13)       | 1.240(6) | O(2)–C(13)        | 1.287(7) |
| O(5)–C(28)       | 1.264(6) | O(6)–C(28)        | 1.263(5) |
| O(3)–C(15)       | 1.359(6) | O(4)–C(26)        | 1.374(5) |
| O(1)–Zn(1)–O(2)  | 57.7(1)  | O(1)–Zn(1)–O(6A)  | 150.5(1) |
| O(1)–Zn(1)–O(7)  | 87.3(1)  | O(1)–Zn(1)–N(1)   | 111.4(1) |
| O(1)–Zn(1)–N(2)  | 90.2(1)  | O(2)–Zn(1)–O(6A)  | 93.4(2)  |
| O(2)–Zn(1)–O(7)  | 96.7(2)  | O(2)–Zn(1)–N(1)   | 165.1(2) |
| O(2)–Zn(1)–N(2)  | 92.1(2)  | O(6A)–Zn(1)–O(7)  | 91.0(1)  |
| O(6A)–Zn(1)–N(1) | 98.0(1)  | O(6A)–Zn(1)–N(2)  | 97.1(1)  |
| O(7)–Zn(1)–N(1)  | 92.6(2)  | O(7)–Zn(1)–N(2)   | 167.7(2) |
| N(1)–Zn(1)–N(2)  | 77.1(1)  | C(16)–C(24)–C(25) | 117.0(4) |

### Compound 10

|                    |           |                    |           |
|--------------------|-----------|--------------------|-----------|
| Cd(1)–O(1)         | 2.441(2)  | Cd(1)–O(2)         | 2.311(2)  |
| Cd(1)–O(3)         | 2.275(2)  | Cd(1)–N(2)         | 2.312(3)  |
| Cd(1)–O(4)         | 2.251(2)  | Cd(1)–N(1)         | 2.338(3)  |
| O(1)–C(1)          | 1.263(4)  | O(2)–C(1)          | 1.253(4)  |
| O(3A)–C(12)        | 1.244(4)  | O(4)–C(12)         | 1.260(4)  |
| O(5)–C(22)         | 1.355(3)  | O(6)–C(11)         | 1.356(4)  |
| O(1)–Cd(1)–O(2)    | 54.91(7)  | O(1)–Cd(1)–O(3)    | 148.46(8) |
| O(1)–Cd(1)–O(4)    | 90.44(9)  | O(1)–Cd(1)–N(1)    | 91.08(9)  |
| O(1)–Cd(1)–N(2)    | 87.98(9)  | O(2)–Cd(1)–O(3)    | 94.23(8)  |
| O(2)–Cd(1)–O(4)    | 97.76(9)  | O(2)–Cd(1)–N(1)    | 89.48(9)  |
| O(2)–Cd(1)–N(2)    | 138.44(9) | O(3)–Cd(1)–O(4)    | 101.2(1)  |
| O(3)–Cd(1)–N(1)    | 81.4(1)   | O(3)–Cd(1)–N(2)    | 117.80(9) |
| O(4)–Cd(1)–N(1)    | 172.1(1)  | O(4)–Cd(1)–N(2)    | 100.8(1)  |
| N(1)–Cd(1)–N(2)    | 71.5(1)   | C(10)–C(23)–C(10A) | 118.2(3)  |
| C(21)–C(24)–C(21B) | 117.6(3)  |                    |           |

### Compound 11

|            |          |            |          |
|------------|----------|------------|----------|
| Cu(1)–O(1) | 1.974(1) | Cu(1)–N(1) | 2.026(2) |
|------------|----------|------------|----------|

|                  |           |                  |          |
|------------------|-----------|------------------|----------|
| Cu(1)–N(2B)      | 1.996(2)  | Cu(1)–O(4)       | 2.561(2) |
| O(1)–C(12)       | 1.270(2)  | O(2)–C(12)       | 1.250(3) |
| O(3)–C(2)        | 1.355(2)  |                  |          |
| O(1)–Cu(1)–O(1A) | 176.24(7) | O(1)–Cu(1)–N(1)  | 88.12(4) |
| O(1)–Cu(1)–N(2B) | 91.88(4)  | O(1)–Cu(1)–O(4)  | 97.11(6) |
| O(1)–Cu(1)–O(4A) | 82.56(6)  | N(1)–Cu(1)–O(4)  | 84.89(4) |
| N(2B)–Cu(1)–O(4) | 95.11(4)  | N(2B)–Cu(1)–N(1) | 180      |
| O(4A)–Cu(1)–O(4) | 169.78(6) | C(3)–C(11)–C(3C) | 118.0(3) |

### Compound 12

|                   |          |                   |          |
|-------------------|----------|-------------------|----------|
| Cd(1)–O(1)        | 2.572(4) | Cd(1)–O(2)        | 2.310(4) |
| Cd(1)–O(5A)       | 2.528(4) | Cd(1)–O(6A)       | 2.339(5) |
| Cd(1)–N(1B)       | 2.421(5) | Cd(1)–N(2)        | 2.369(5) |
| Cd(1)–N(3)        | 2.319(5) | O(1)–C(11)        | 1.250(7) |
| O(2)–C(11)        | 1.273(7) | O(5)–C(23)        | 1.267(7) |
| O(6)–C(23)        | 1.231(8) | O(3)–C(3)         | 1.358(6) |
| O(4)–C(14)        | 1.360(7) |                   |          |
| O(1)–Cd(1)–O(2)   | 53.0(1)  | O(1)–Cd(1)–O(5A)  | 90.6(1)  |
| O(1)–Cd(1)–O(6A)  | 142.1(1) | O(1)–Cd(1)–N(1B)  | 136.8(1) |
| O(1)–Cd(1)–N(2)   | 82.4(2)  | O(1)–Cd(1)–N(3)   | 89.3(2)  |
| O(2)–Cd(1)–O(5A)  | 143.5(2) | O(2)–Cd(1)–O(6A)  | 162.3(2) |
| O(2)–Cd(1)–N(1B)  | 83.9(1)  | O(2)–Cd(1)–N(2)   | 85.3(2)  |
| O(2)–Cd(1)–N(3)   | 95.9(2)  | O(5A)–Cd(1)–O(6A) | 53.2(2)  |
| O(5A)–Cd(1)–N(1B) | 132.4(2) | O(5A)–Cd(1)–N(2)  | 92.8(2)  |
| O(5A)–Cd(1)–N(3)  | 79.4(2)  | O(6A)–Cd(1)–N(1B) | 80.7(2)  |
| O(6A)–Cd(1)–N(2)  | 88.2(2)  | O(6A)–Cd(1)–N(3)  | 93.7(2)  |
| N(1B)–Cd(1)–N(2)  | 97.4(2)  | N(1B)–Cd(1)–N(3)  | 94.1(2)  |
| N(2)–Cd(1)–N(3)   | 168.6(2) | C(4)–C(12)–C(13)  | 114.1(5) |

[a] Symmetry transformations used to generate equivalent atoms. For **3**: A  $x - 1/2, -y + 3/2, z - 1/2$ . For **4**: A  $-x + 2, y, -z + 1/2$ ; B  $-x + 2, y + 1, -z + 1/2$ ; C  $x, y + 1, z$ . For **5**: A  $x, -y + 2, z + 1/2$ . For **6**: A  $x - 1/2, -y + 1, z + 1/2$ . For **7**: A  $-x + 1, y, -z + 3/2$ ; B  $-x, y, -z + 1/2$ . For **8**: A  $x, -y + 1/2, z + 1/2$ . For **9**: A  $x, -y + 5/2, z + 1/2$ . For **10**: A  $-x + 1, y, -z + 3/2$ ; B  $-x + 1, y, -z + 1/2$ . For **11**: A  $-x + 1, y, -z + 3/2$ ; B  $x, y - 1, z$ ; C  $-x, y, -z + 1/2$ . For **12**: A  $x + 1, -y + 1/2, z + 1/2$ ; B  $-x, y - 1/2, -z + 1/2$ .

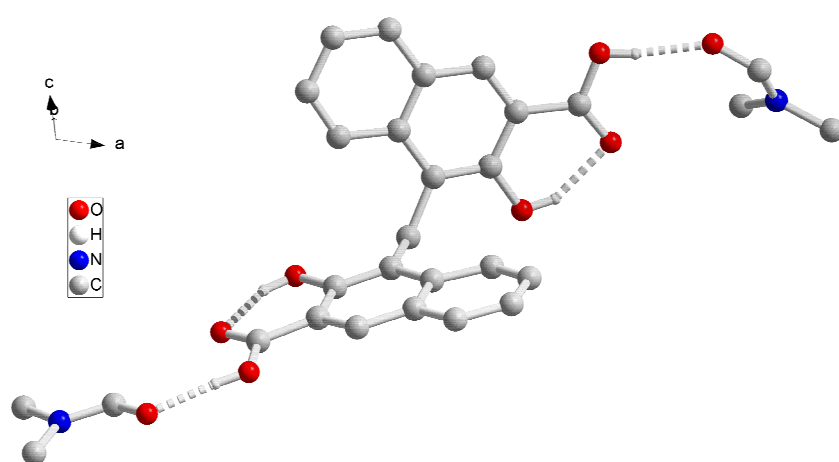

**Fig. S1** A portion view of **1** showing the hydrogen bonding
